# Supplementary material
Source: PubMed Central journal article supplement (PMC3280549)
Supplement: emboj2011449s2.pdf [file emboj2011449s2.pdf]

Table S1A

| Genotype                                                      | Hatching Rate    |
|---------------------------------------------------------------|------------------|
| <i>y w</i>                                                    | 673/859 (78.3%)  |
| <i>kumo<sup>M41-13</sup>/TM3</i>                              | 738/912 (80.9%)  |
| <i>kumo<sup>M41-13</sup></i>                                  | 0/779 (0%)       |
| <i>w<sup>-</sup>;Myc-Kumo/nosgal4;kumo<sup>M41-13</sup></i>   | 693/917 (75.5%)  |
| <i>w<sup>-</sup>;Myc-KumoNT/nosgal4;kumo<sup>M41-13</sup></i> | 0/478 (0%)       |
| <i>w<sup>-</sup>;Myc-KumoCT/nosgal4;kumo<sup>M41-13</sup></i> | 287/622 (46.14%) |

Table S1B

| Genotype                                                    | Normal appendages |
|-------------------------------------------------------------|-------------------|
| <i>y w</i>                                                  | 663/712 (93.1%)   |
| <i>kumo<sup>M41-13</sup>/TM3</i>                            | 651/689 (94.4%)   |
| <i>kumo<sup>M41-13</sup></i>                                | 268/636 (42.1%)   |
| <i>w<sup>-</sup>;Myc-Kumo/nosgal4;kumo<sup>M41-13</sup></i> | 475/540 (87.9%)   |

Table S1A: Hatching rate of eggs from wild type, *kumo* mutant, *kumo* mutants expressing Kumo-NT, and Kumo-CT transgenes mothers.

Table S1B: Comparison of number of eggs having normal appendages from wild type, *kumo* mutant, and *kumo* mutants expressing full length kumo transgene mothers
